# Supplementary material
Source: PubMed Central journal article supplement (PMC5545891)
Supplement: NIHMS61659-supplement-si20061011_065.pdf [file NIHMS61659-supplement-si20061011_065.pdf]

# Biological mechanisms of action of novel C-10 non-acetal trioxane dimers in prostate cancer cell lines

*Adebusola A. Alagbala,<sup>1</sup> Andrew J. McRiner,<sup>2</sup> Kristina Borstnik,<sup>2</sup> Tanzina Labonte,<sup>2</sup> Wonsuk Chang,<sup>2</sup>  
John G. D'Angelo,<sup>2</sup> Gary H. Posner,<sup>2</sup> Barbara A. Foster<sup>1,\*</sup>*

<sup>1</sup>Roswell Park Cancer Institute, Department of Pharmacology and Therapeutics, Buffalo, NY, USA;

<sup>2</sup>Johns Hopkins University, Department of Chemistry and Malaria Research Institute, Baltimore, MD,  
USA.

*Barbara.Foster@RoswellPark.org*

## Supporting Information

|                                                 |         |
|-------------------------------------------------|---------|
| <sup>1</sup> H NMR Spectra.....                 | S1-S3   |
| <sup>13</sup> C NMR Spectra.....                | S4-S6   |
| HPLC traces for <b>1 (AJM3/23)</b> .....        | S7-S8   |
| HPLC traces for <b>2 (GHP-TM-III-07w)</b> ..... | S9-S10  |
| HPLC traces for <b>3 (GHP-KB-06)</b> .....      | S11-S12 |

AJM3/23 c01 09/10/02  
 Solvent: CDCl3  
 Ambient temperature  
 UNITYplus-400 "Purcell1400"  
 PULSE SEQUENCE  
 Relax delay arrayed  
 1st pulse arrayed  
 2nd pulse 31.5 degrees  
 Acq. time 3.744 sec  
 Width 10000.0 Hz  
 Observed repetitions  
 3  
 DATA PROCESSING  
 FT size 131072  
 Total time 3 minutes

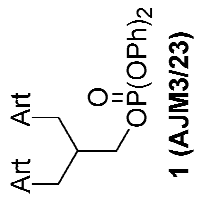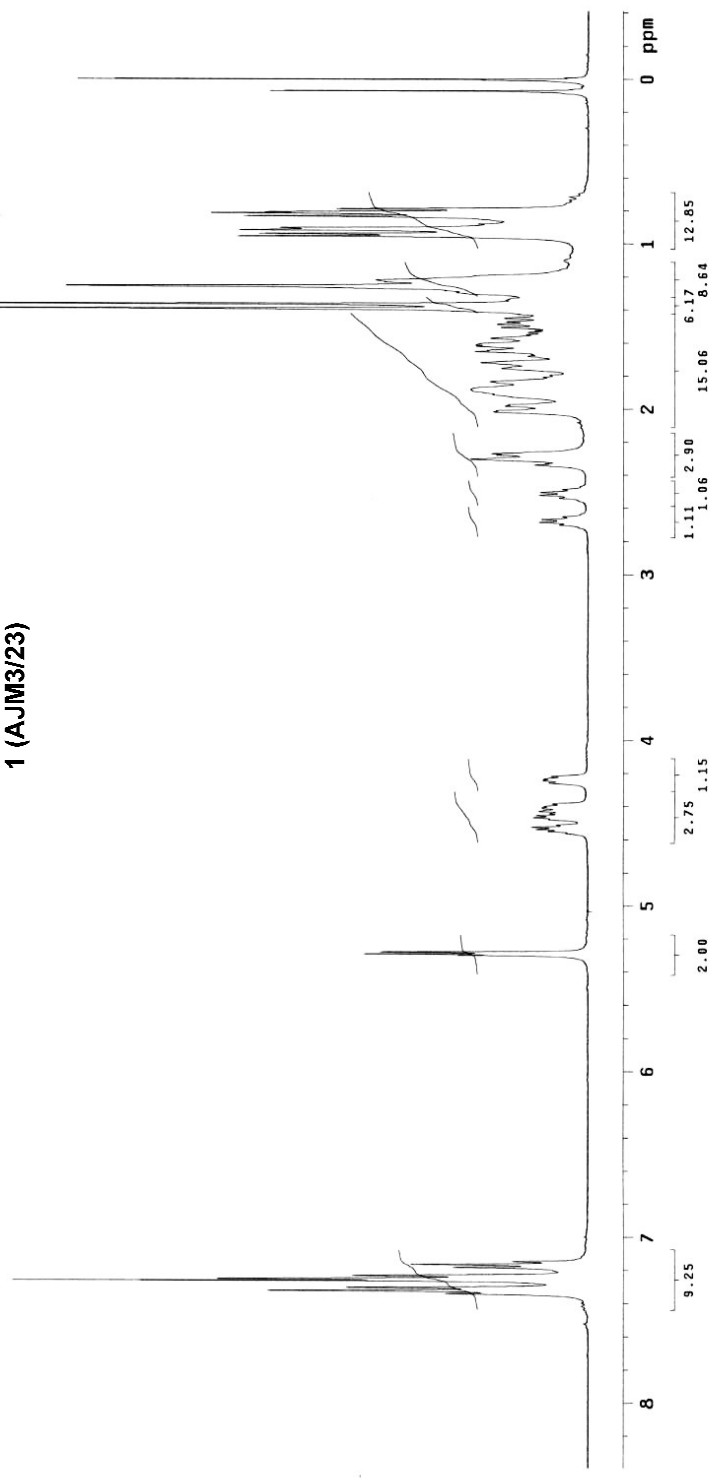

TM-III-07w  
062203  
Solvent: CDCl3  
Ambient temperature  
UNITYplus-400 "purcell400"  
PULSE SEQUENCE  
Relax. delay arrayed  
1st pulse arrayed  
2nd pulse 31.5 degrees  
Acq. time 3.744 sec  
Width 5000.0 Hz  
Arrayed repetitions  
OBSERVE H1 399.9597462 MHz  
DATA PROCESSING  
FT size 65536  
Total time 1 minute

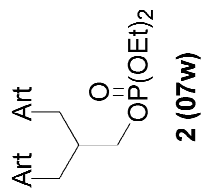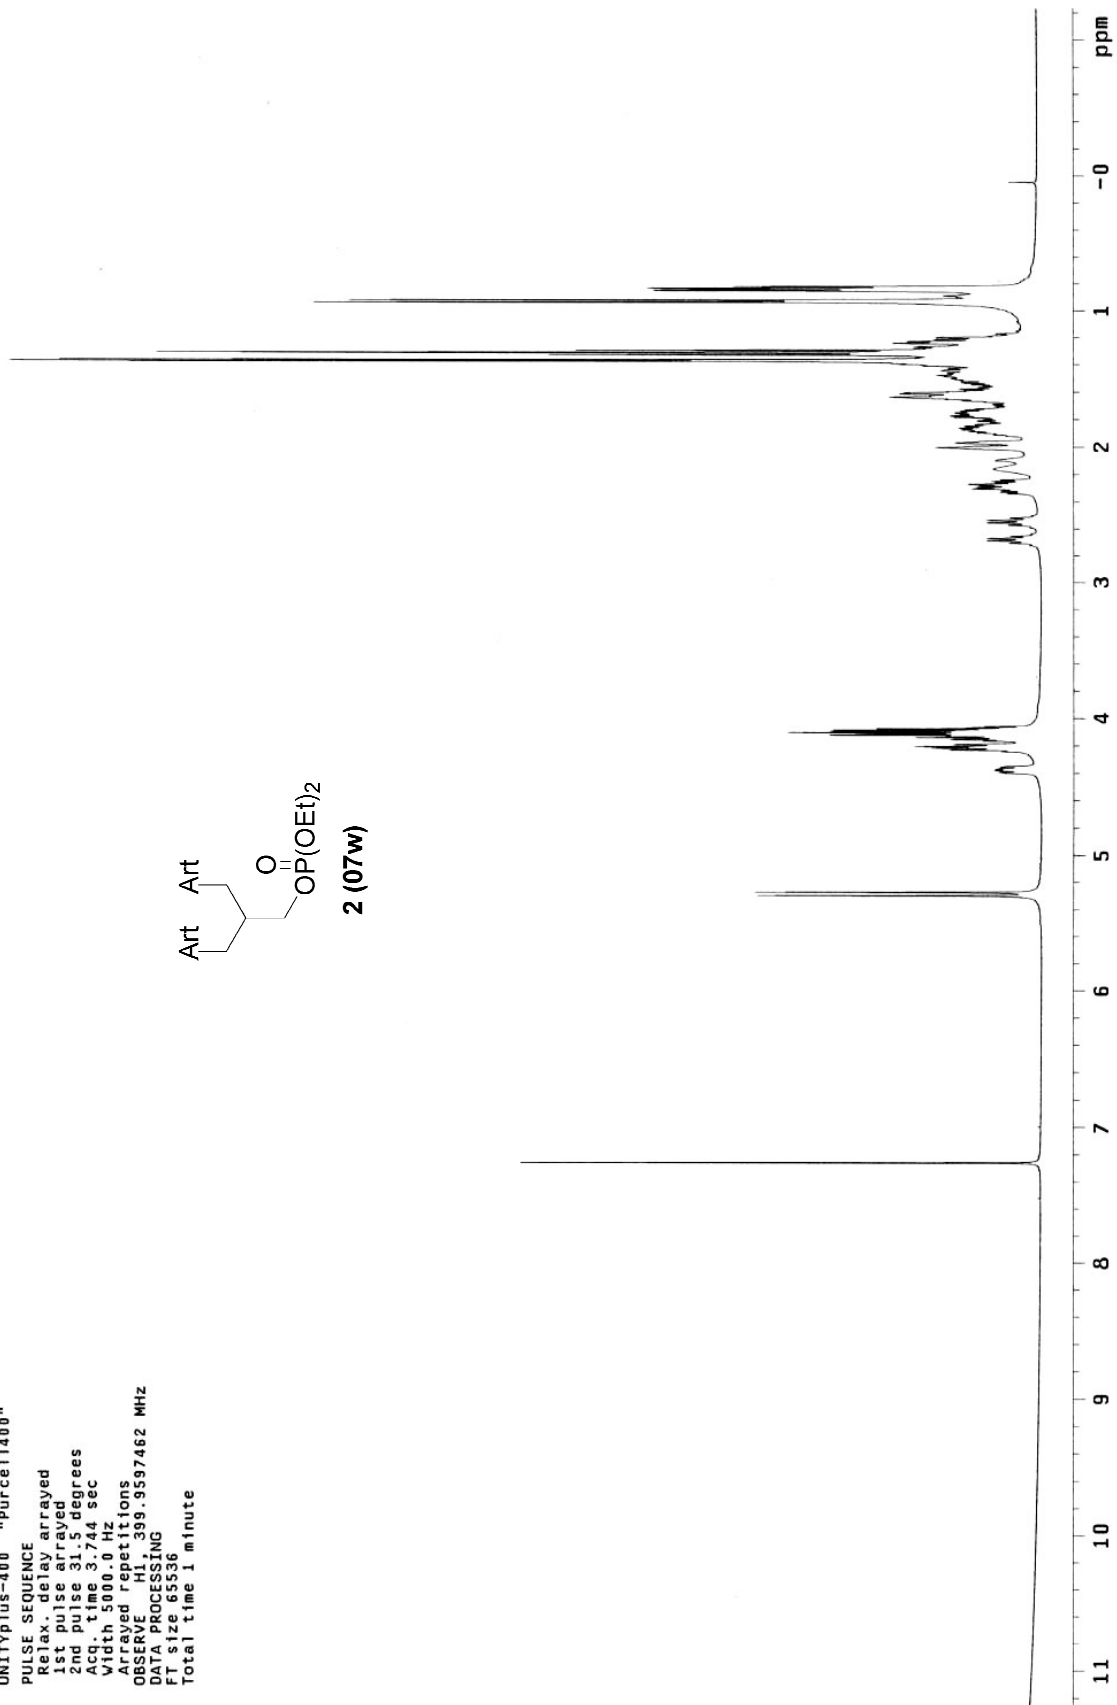

06-25-03, KB-06  
 Solvent: CDCl3  
 Ambient temperature  
 UNITYplus-400 "Purcell1400"  
 PULSE\_SEQUENCE  
 Relax delay arrayed  
 1st pulse arrayed  
 2nd pulse 31 degrees  
 Acq. time 3.744 SEC  
 Width 5000.0 Hz  
 Arrayed repetitions  
 OBSERVE H1, 399.9597461 MHZ  
 DATA PROCESSING  
 FT size 65536  
 Total time 2 minutes

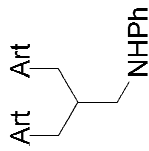

3 (KB06)

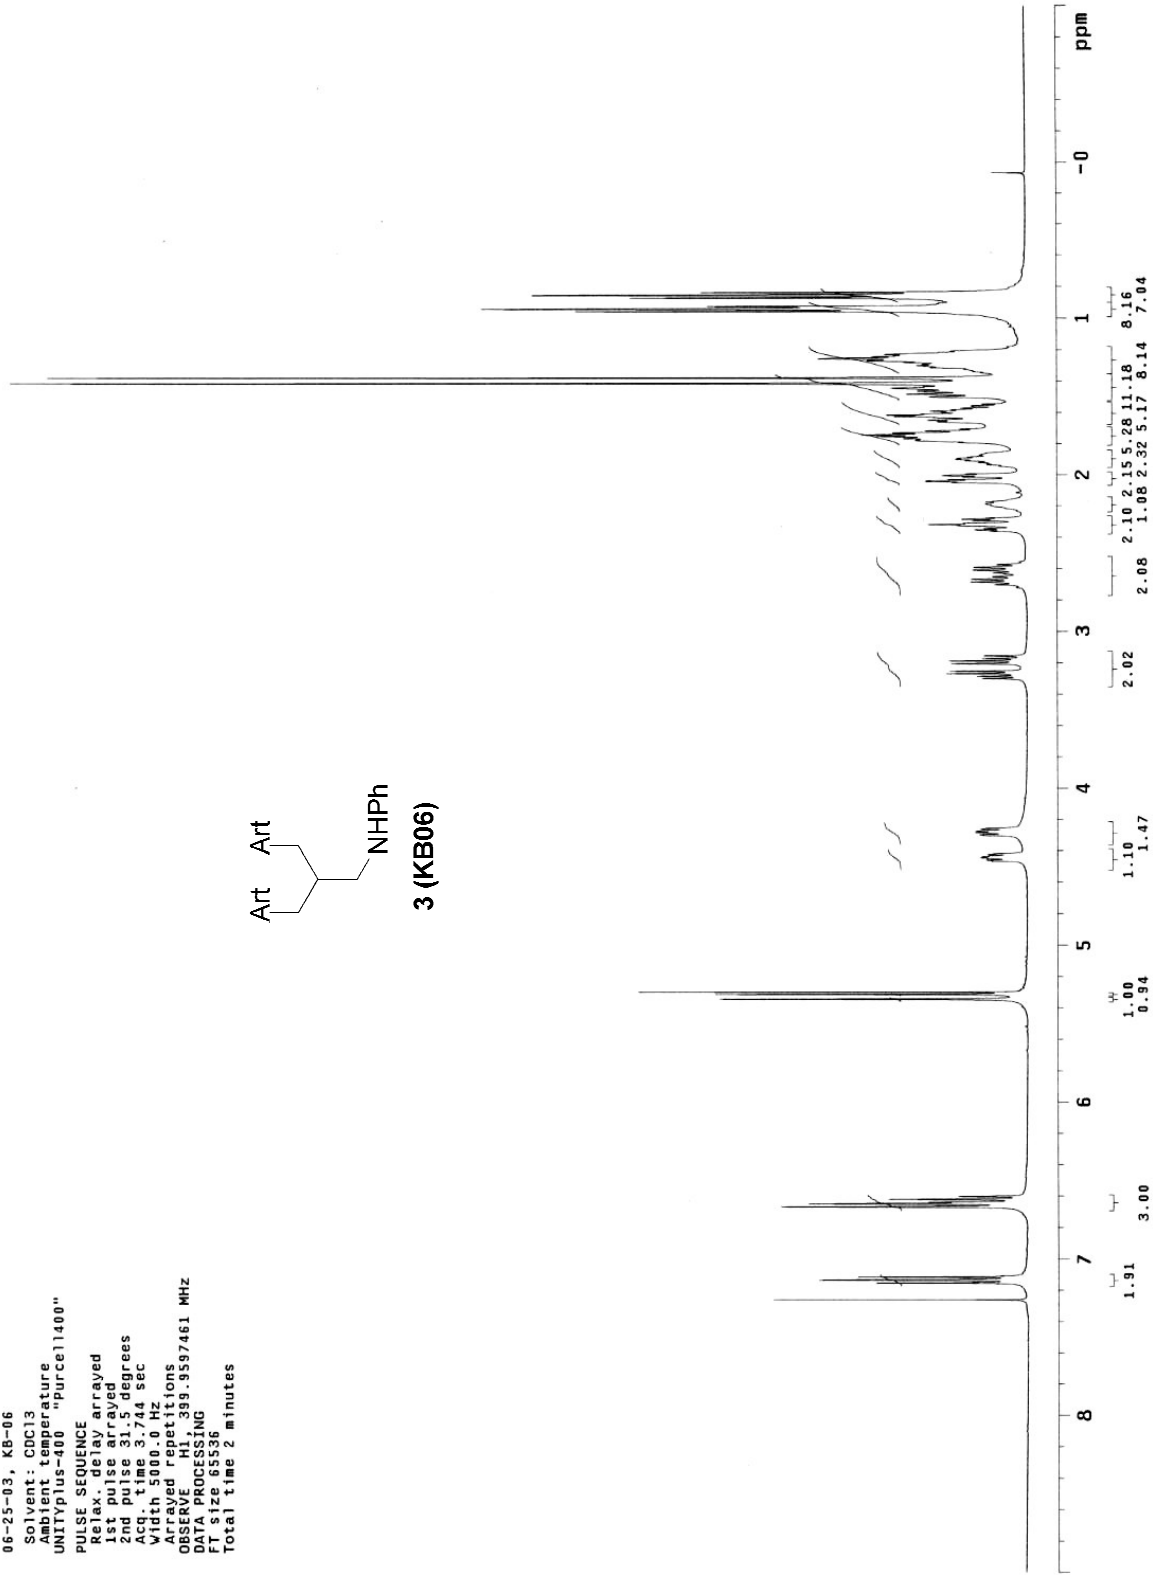

AJM3/23 co1 09/09/02  
 Solvent: CDCl3  
 Ambient temperature  
 UNITYplus-400 "Purcell400"  
 PULSE SEQUENCE  
 Relax. delay arrayed  
 1st pulse arrayed  
 2nd pulse 60.0 degrees  
 Acq. time 1.199 sec  
 Width 25000.0 Hz  
 Arrayed repetitions  
 OBSERVE C13, 100.4541472 MHZ  
 DECOUPLE H1, 399.5005548 MHZ  
 Power 32 dB  
 continuously on  
 WALTZ-16 modulated  
 DATA PROCESSING  
 Line broadening 1.0 Hz  
 FT size 65536  
 Total time 16 minutes

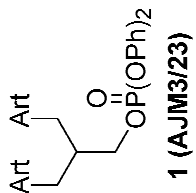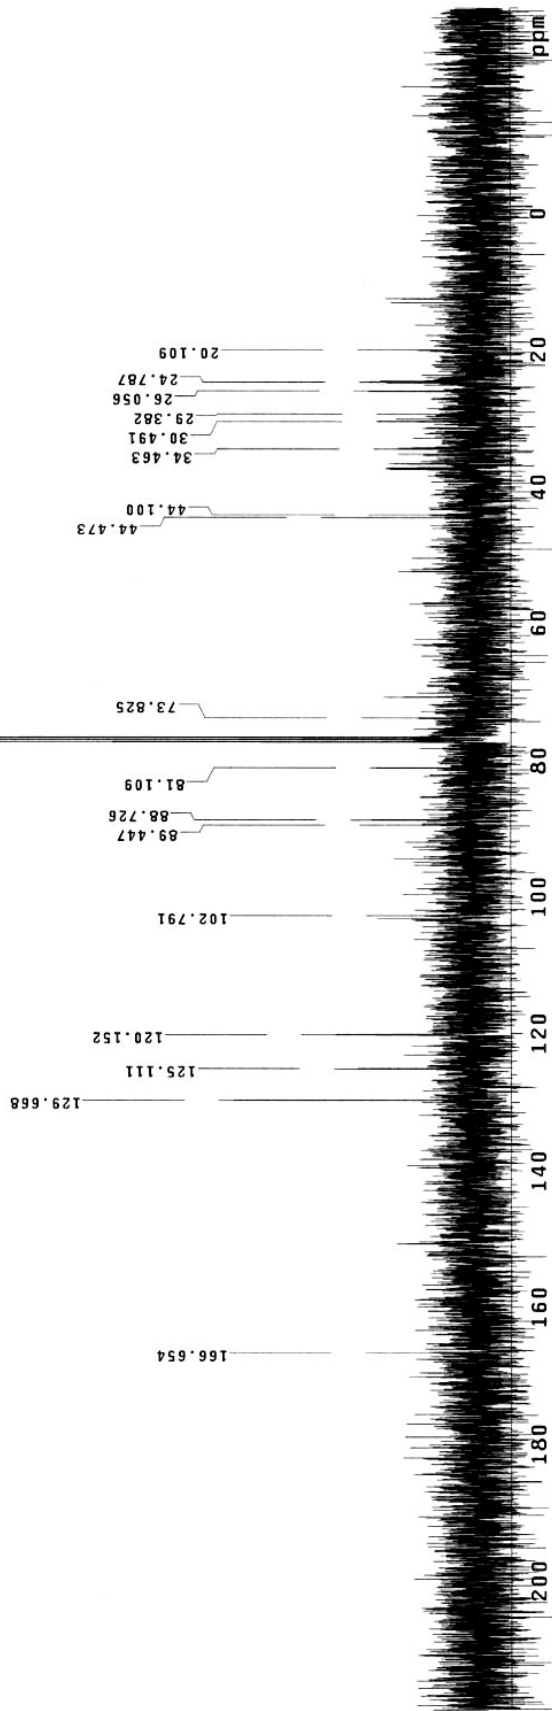

TM-III-07w  
 062203  
 Solvent: CDCl3  
 Ambient temperature  
 UNITYplus-400 "Purcell1400"  
 PULSE SEQUENCE  
 Relax. delay arrayed  
 1st pulse arrayed  
 2nd pulse 60.0 degrees  
 Acq. time 1.199 sec  
 Width 25000.0 Hz  
 Arrayed repetitions  
 OBSERVE C13, 100.5699613 MHZ  
 DECOUPLE H1, 399.9610758 MHZ  
 Power 32 dB  
 continuously on  
 WALTZ-16 modulated  
 DATA PROCESSING  
 Line broadening 1.0 Hz  
 FT size 65536  
 Total time 8 minutes

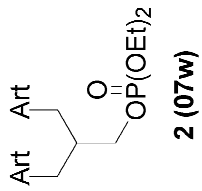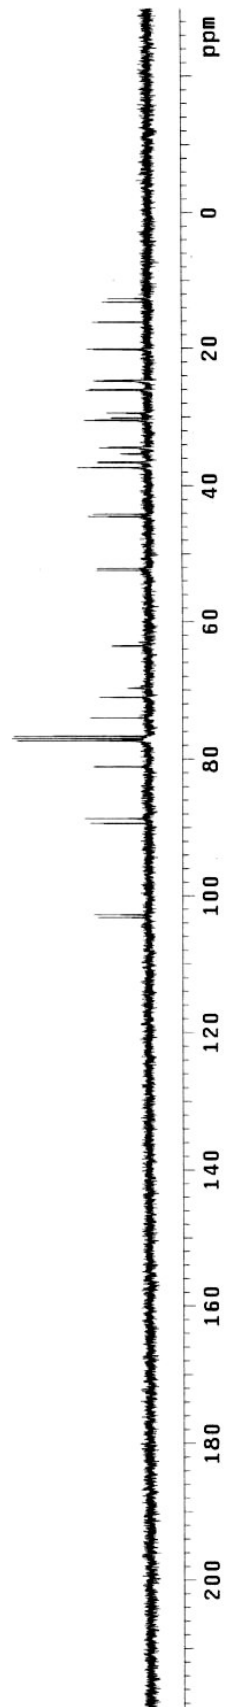

06-26-93, KB-96  
 Solvent: CDCl3  
 Ambient temperature  
 UNIT: plus-400 "Purcell1400"  
 PULSE SEQUENCE  
 Relax. delay arrayed  
 2nd pulse 50.0 degrees  
 Acq. time 1.198 sec  
 Width 25000.0 Hz  
 Arrayed repetitions  
 OBSERVE C13, 100.5689595 MHz  
 DECOUPLE H1, 399.9610758 MHz  
 LOW PASS FILTER ON  
 CONTINUOUSLY  
 VALTZ-16 modulated  
 DATA PROCESSING  
 Line broadening 1.0 Hz  
 FT size 65536  
 Total time 10.1 hours

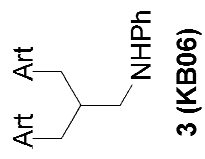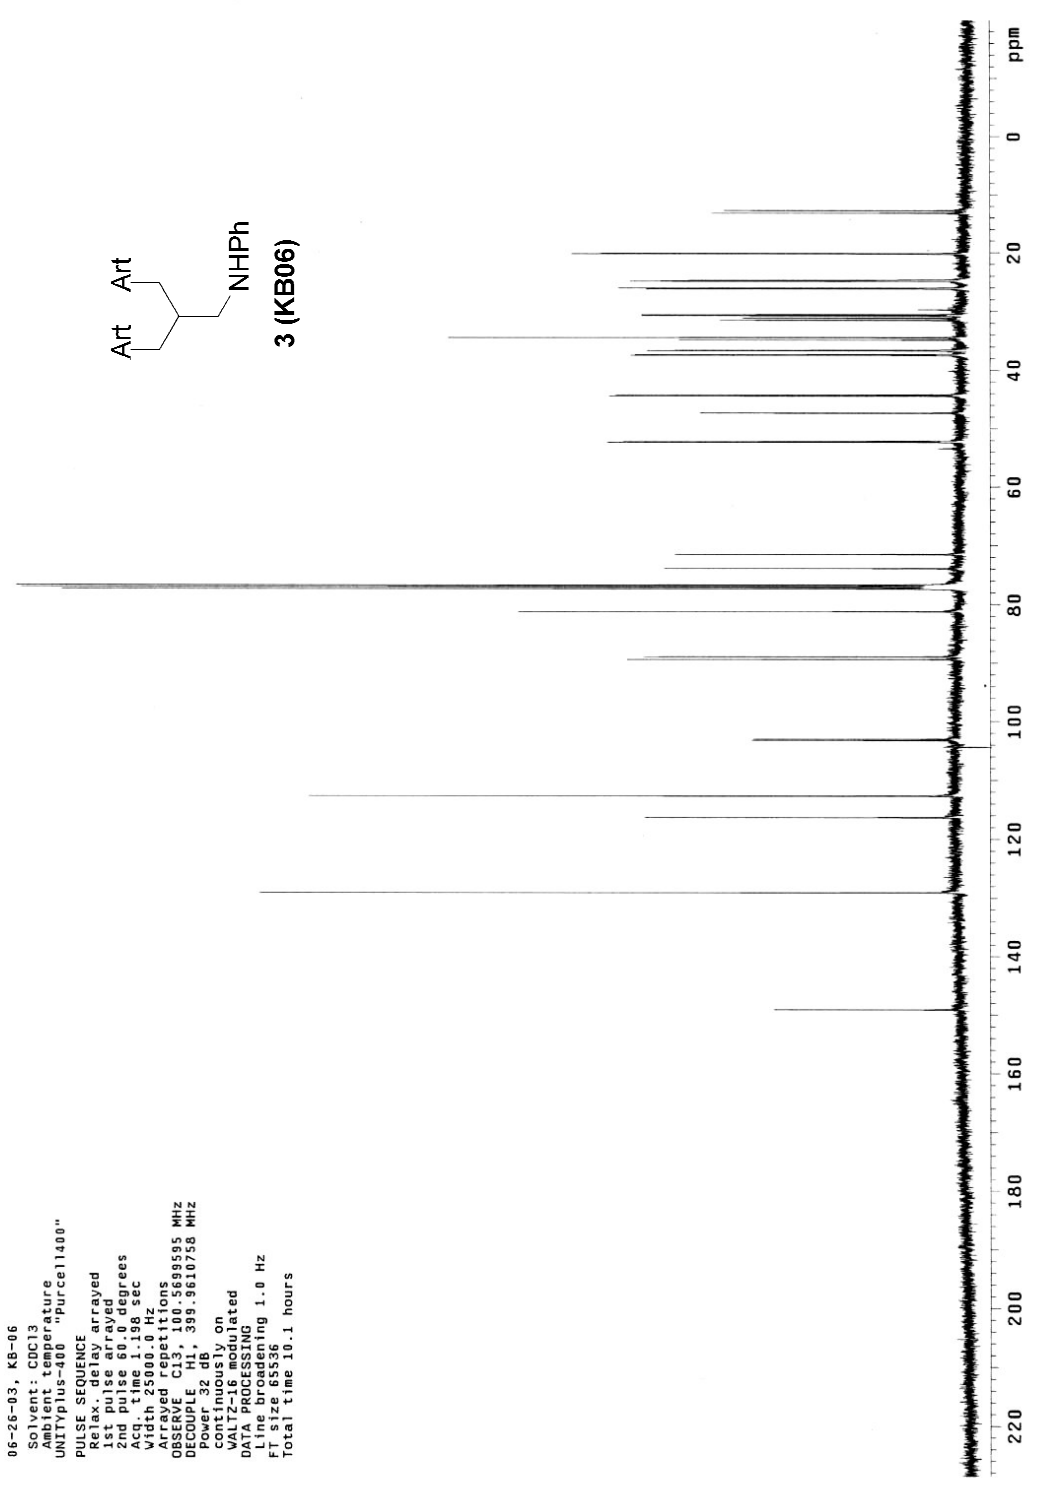

Date: Mon, Jun 19, 2006 8:54 PM

Data: 90\_per\_cent\_EA\_in\_hex

Sample: 1 (AJM3/23)  
New Dynamax Si Semi-Prep (1x25cm)  
90% EtOAc in Hex  
2.5 mL/min, 0.46 psi

Processing File: 1\_2  
Sampling Int: 0.1 Seconds

Data:

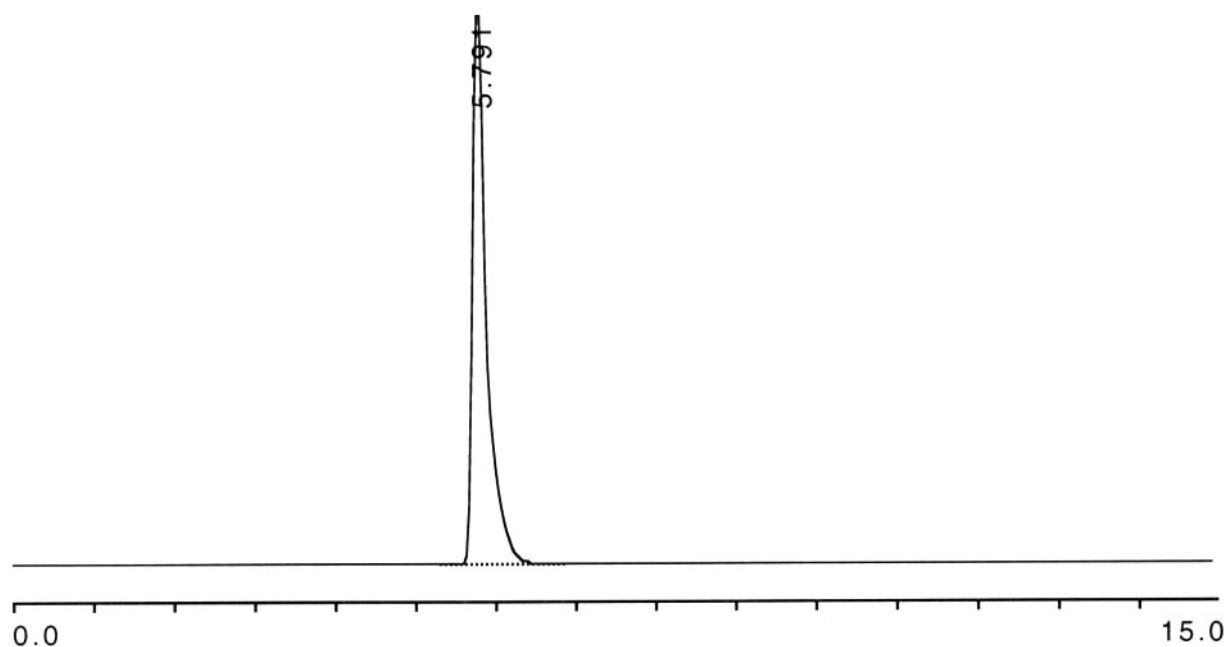

Analysis: Channel A

| Peak No.   | Time  | Type | Height( $\mu$ V) | Area( $\mu$ V-sec) | Area%          |
|------------|-------|------|------------------|--------------------|----------------|
| 1          | 5.791 | Err! | 1095519          | <u>11451118</u>    | <u>100.000</u> |
| Total Area |       |      |                  | 11451118           | 100.000        |



Date: Mon, Jun 19, 2006 9:39 PM

Data: 75\_per\_cent\_EA\_in\_hex

Sample: 1 (AJM3/23)  
New Dynamax Si Semi-Prep (1x25cm)  
75% EtOAc in Hex  
2.5 mL/min, 0.42 psi

Processing File: 1\_1  
Sampling Int: 0.1 Seconds

Data:

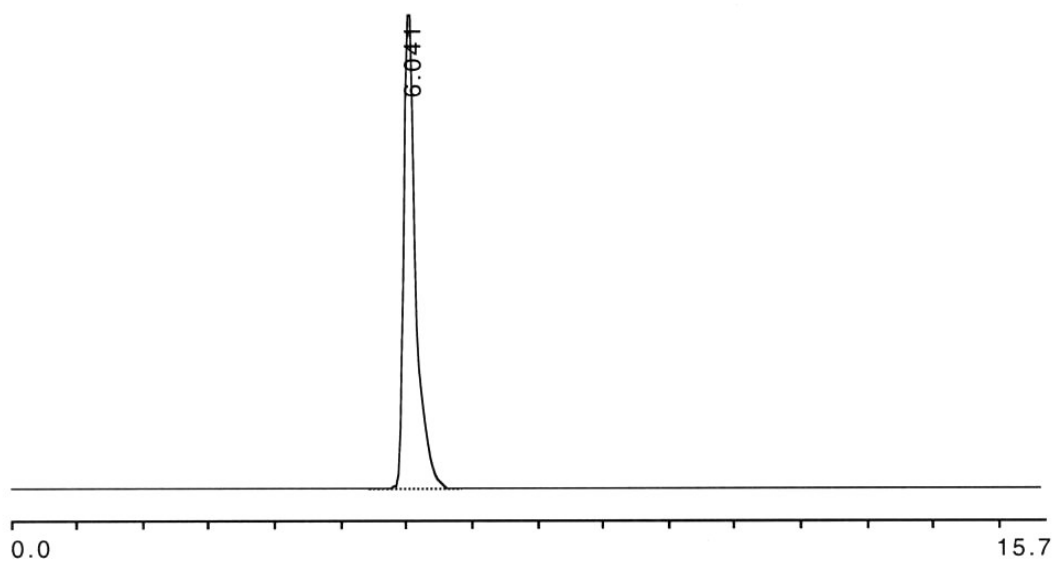

Analysis: Channel A

| Peak No.   | Time  | Type | Height(μV) | Area(μV-sec) | Area%   |
|------------|-------|------|------------|--------------|---------|
| 1          | 6.041 | N9   | 571570     | 6267906      | 100.000 |
| Total Area |       |      |            | 6267906      | 100.000 |

Date: Mon, Jun 19, 2006 10:50 PM

Data: 75\_per\_cent\_trace

Sample: 2 (07w)  
New Dynamax Si Semi-Prep (1x25cm)  
75% EtOAc in Hex  
2.5 mL/min, 0.43 psi

Processing File: 2\_1  
Sampling Int: 0.1 Seconds

Data:

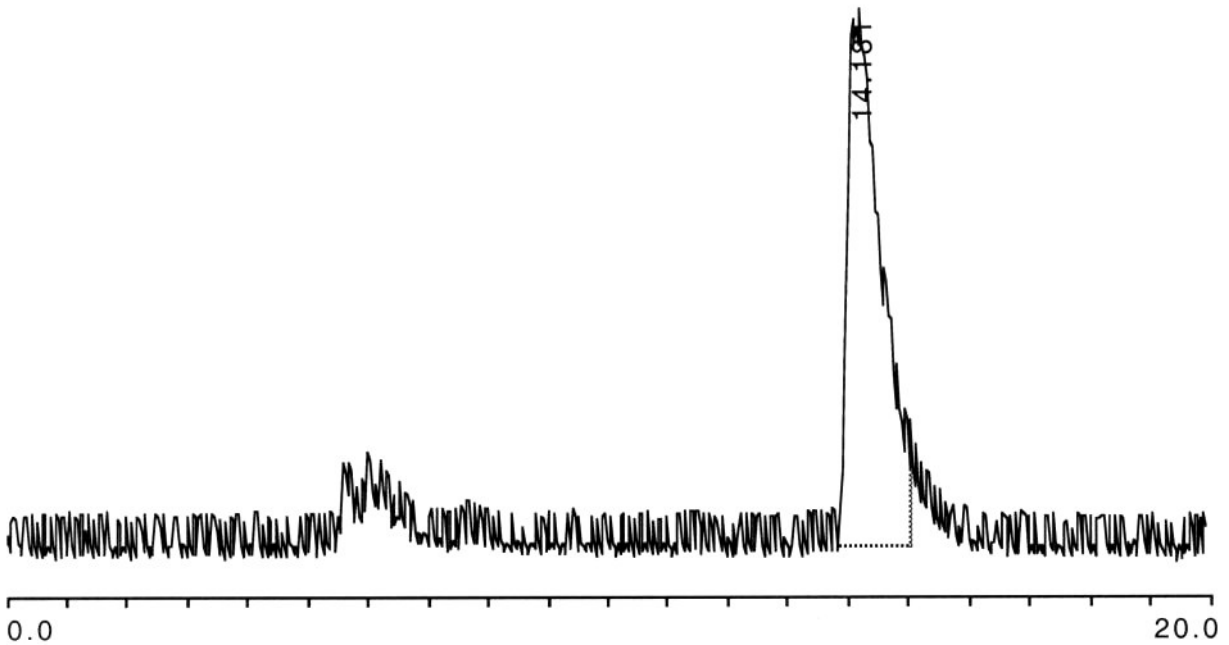

Analysis: Channel A

| Peak No.   | Time   | Type | Height( $\mu\text{V}$ ) | Area( $\mu\text{V}\cdot\text{sec}$ ) | Area%   |
|------------|--------|------|-------------------------|--------------------------------------|---------|
| 1          | 14.181 | N1   | 10856                   | 394729                               | 100.000 |
| Total Area |        |      |                         | 394729                               | 100.000 |

Date: Sat, Jun 28, 2003 7:10 PM

Data: TM-III-07w-062803d

Sample: 2 (07w)  
Silica semi-prep column;  
60% EtOAc in hexanes  
Flow =3.0 mL/min, P = 0.30 kpsi  
UV detector @ 254 nm

Processing File: 2\_2  
Sampling Int: 0.1 Seconds

Data:

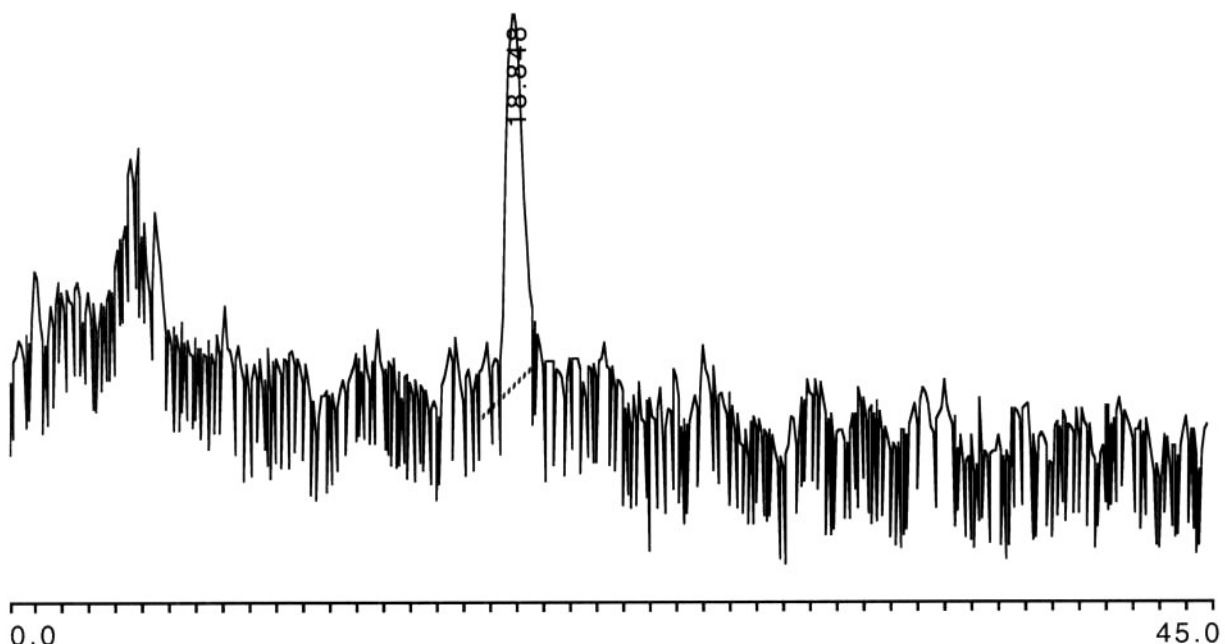

Analysis: Channel A

| Peak No.   | Time   | Type | Height( $\mu$ V) | Area( $\mu$ V-sec) | Area%          |
|------------|--------|------|------------------|--------------------|----------------|
| 1          | 18.848 | N    | 3286             | <u>116043</u>      | <u>100.000</u> |
| Total Area |        |      |                  | 116043             | 100.000        |

Date: Mon, Jun 26, 2006 4:38 PM  
Data: 20\_per\_cent\_trace

Sample: 3 (KBO6)  
Dynamax 1x25 cm  
20% EtOAc/hexanes  
2.5 mL/min, 0.24 kpsi, 270 nm

Processing File:  
Sampling Int: 0.1 Seconds

Data:

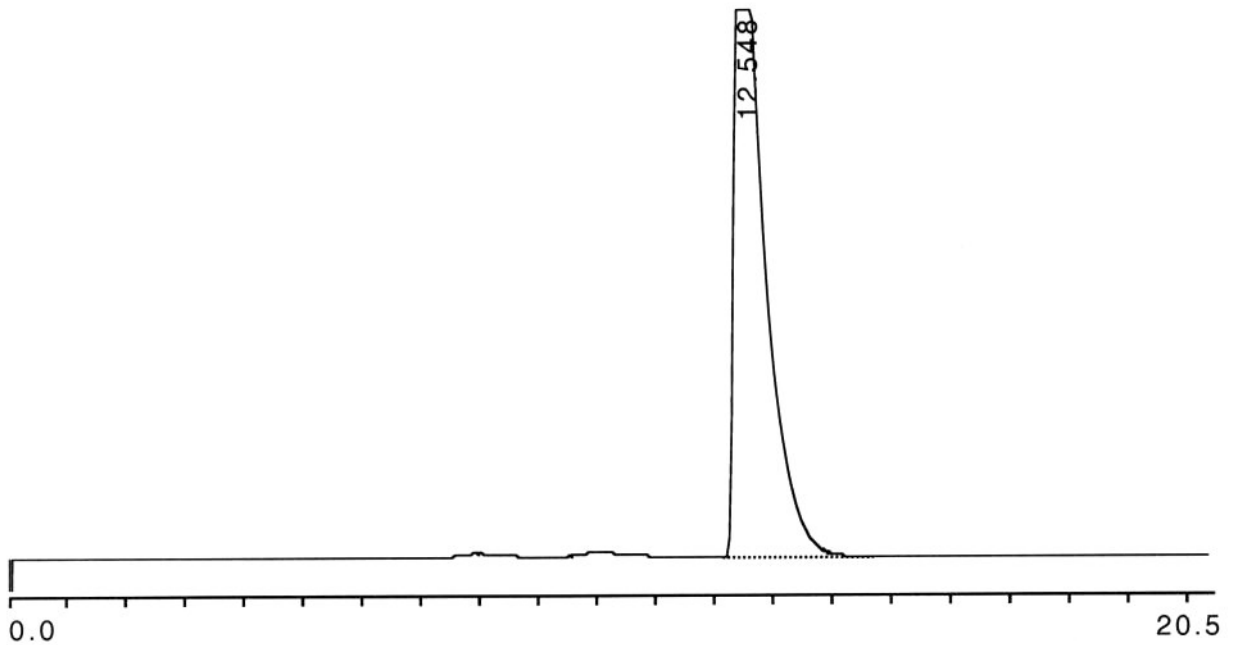

Analysis: Channel A

| Peak No.   | Time   | Type | Height( $\mu$ V) | Area( $\mu$ V-sec) | Area%          |
|------------|--------|------|------------------|--------------------|----------------|
| 1          | 12.548 | Err! | 1193546          | <u>44299336</u>    | <u>100.000</u> |
| Total Area |        |      |                  | 44299336           | 100.000        |

Date: Mon, Jun 26, 2006 5:09 PM

Data: 25\_per\_cent\_trace

Sample: 3 (KBO6)  
Dynamax 1x25 cm  
25% EtOAc/hexanes  
2.5 mL/min, 0.23 kpsi, 270 nm

Processing File:  
Sampling Int: 0.1 Seconds

Data:

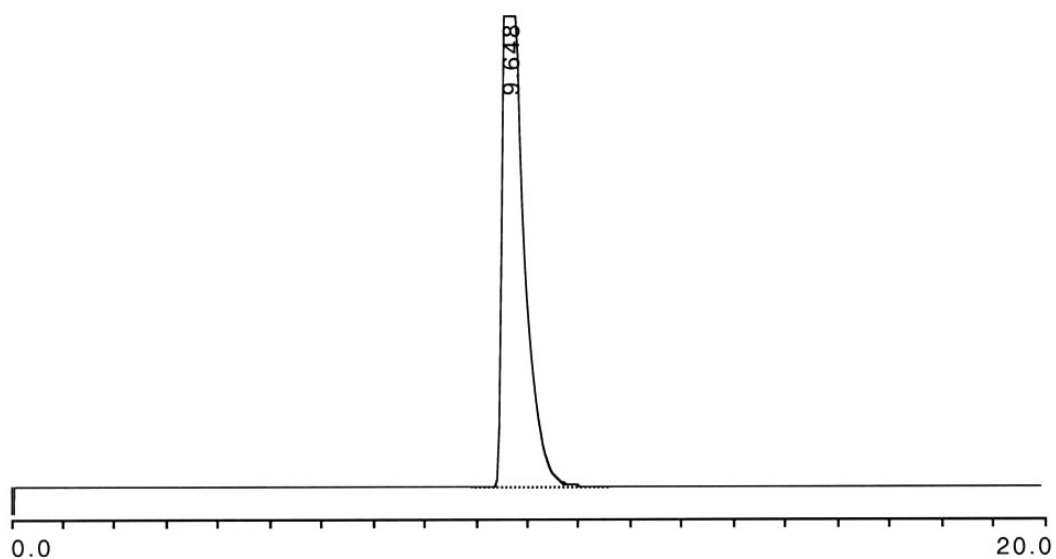

Analysis: Channel A

| Peak No.   | Time  | Type | Height( $\mu V$ ) | Area( $\mu V$ -sec) | Area%          |
|------------|-------|------|-------------------|---------------------|----------------|
| 1          | 9.648 | Err! | 1193822           | <u>33853708</u>     | <u>100.000</u> |
| Total Area |       |      |                   | 33853708            | 100.000        |
